# Supplementary material for: A novel approach to assessing the bioavailability of biopeptide inhibitor of HMG CoA reductase from germinated and ungerminated Kara Kratok (Phaseolus lunatus L.)
Source: PeerJ journal article supplement (doi:10.7717/peerj.19262), 2025-04-23
Supplement: Data.xlsx [file Data.xlsx]

## Sheet: Fig 2A
	Figure 2A. Percentage of hydrolysis degree from germinated and ungerminated P. lunatus during digestion gastrointestinal simulation via in vitro method.
	Sample	Batch	Hydrolysis Degree (%)
			Ungerminated		Germinated (72-h)
			Average	Analysis Repetition	Average	Analysis Repetition
	0 menit	1		0		0
			0	0	0	0
				0		0
		2		0		0
			0	0	0	0
				0		0
		3		0		0
			0	0	0	0
				0		0
	30 menit	1		0.00725		0.1463
			0.0071	0.00703	0.1522	0.1548
				0.00702		0.1555
		2		0.00773		0.1294
			0.0076	0.00754	0.1273	0.1176
				0.00753		0.1349
		3		0.00614		0.119
			0.006	0.006	0.1138	0.1084
				0.00586		0.114
	60 menit	1		0.1255		0.1768
			0.1231	0.1168	0.1703	0.1643
				0.127		0.1698
		2		0.1302		0.1787
			0.1236	0.1192	0.1748	0.1706
				0.1214		0.1751
		3		0.1168		0.1834
			0.1195	0.1202	0.1816	0.1801
				0.1215		0.1813
	90 menit	1		0.1673		0.2122
			0.1651	0.1648	0.2132	0.2134
				0.1632		0.214
		2		0.188		0.209
			0.1868	0.1836	0.2109	0.2156
				0.1888		0.2081
		3		0.172		0.1984
			0.1708	0.171	0.1996	0.201
				0.1694		0.1994
	120 menit	1		0.1898		0.2438
			0.1884	0.1879	0.2426	0.2416
				0.1875		0.2424
		2		0.2025		0.2501
			0.2013	0.2001	0.2358	0.2311
				0.2013		0.2262
		3		0.2206		0.2414
			0.2184	0.2164	0.2381	0.2362
				0.2182		0.2367
	150 menit	1		0.2444		0.3054
			0.2412	0.2416	0.3036	0.2987
				0.2376		0.3067
		2		0.2382		0.2824
			0.2355	0.2218	0.281	0.2768
				0.2465		0.2838
		3		0.2356		0.2905
			0.2329	0.2278	0.2878	0.2793
				0.2353		0.2936
	180 menit	1		0.2636		0.3614
			0.2624	0.2577	0.3511	0.3508
				0.2659		0.3411
		2		0.248		0.3482
			0.2453	0.2324	0.3556	0.3664
				0.2555		0.3522
		3		0.2478		0.3329
			0.2556	0.258	0.3443	0.3494
				0.261		0.3506
	210 menit	1		0.3043		0.4826
			0.3158	0.3214	0.4776	0.4746
				0.3217		0.4756
		2		0.2934		0.5106
			0.2888	0.2842	0.507	0.5032
				0.2888		0.5072
		3		0.3224		0.4946
			0.3189	0.3168	0.4822	0.4806
				0.3175		0.4714
	240 menit	1		0.2294		0.3081
			0.2289	0.2272	0.3036	0.2972
				0.2301		0.3055
		2		0.2302		0.3014
			0.2288	0.2217	0.2991	0.2984
				0.2345		0.2975
		3		0.2209		0.2794
			0.2246	0.2278	0.2742	0.2733
				0.2251		0.2699

## Sheet: Fig 2B
	Figure 2B. Peptide concentration from germinated and ungerminated P. lunatus during digestion gastrointestinal simulation via in vitro method.
	Sample	Batch	Peptide concentration (mg/mL)
			Ungerminated		Germinated (72-h)
			Average	Analysis Repetition	Average	Analysis Repetition
	0 menit	1		0.536		0.746
			0.523262	0.516	0.755879	0.762
				0.518		0.76
		2		0.589		0.808
			0.574387	0.563	0.794223	0.774
				0.571		0.801
		3		0.436		0.672
			0.428681	0.414	0.658742	0.644
				0.436		0.66
	30 menit	1		0.562		1.274
			0.543712	0.526	1.26457	1.245
				0.543		1.275
		2		0.552		1.224
			0.546268	0.541	1.19044	1.222
				0.546		1.125
		3		0.548		1.202
			0.538599	0.53	1.11375	1.11
				0.538		1.029
	60 menit	1		1.126		1.354
			1.11631	1.104	1.34126	1.336
				1.119		1.334
		2		1.134		1.342
			1.11887	1.106	1.33615	1.328
				1.117		1.338
		3		1.11		1.346
			1.09842	1.078	1.36426	1.382
				1.107		1.365
	90 menit	1		1.324		1.46
			1.32336	1.31	1.44351	1.424
				1.336		1.447
		2		1.446		1.436
			1.43073	1.428	1.44351	1.453
				1.418		1.442
		3		1.343		1.387
			1.35148	1.322	1.41028	1.416
				1.389		1.428
	120 menit	1		1.423		1.549
			1.43839	1.45	1.55087	1.556
				1.442		1.548
		2		1.494		1.536
			1.5023	1.51	1.54831	1.546
				1.503		1.563
		3		1.576		1.514
			1.58666	1.59	1.52019	1.526
				1.594		1.521
	150 menit	1		1.685		1.786
			1.69913	1.712	1.79116	1.801
				1.7		1.786
		2		1.648		1.688
			1.67101	1.692	1.70169	1.71
				1.673		1.707
		3		1.639		1.714
			1.65823	1.66	1.72981	1.742
				1.676		1.733
	180 menit	1		1.796		1.912
			1.80394	1.801	1.92919	1.935
				1.815		1.941
		2		1.714		1.903
			1.71958	1.726	1.9113	1.916
				1.719		1.915
		3		1.764		1.892
			1.77	1.778	1.90874	1.916
				1.768		1.918
	210 menit	1		2.034		2.352
			2.06723	2.074	2.37142	2.386
				2.094		2.376
		2		1.926		2.433
			1.9343	1.942	2.44555	2.45
				1.935		2.454
		3		2.074		2.337
			2.08257	2.078	2.34842	2.345
				2.096		2.363
	240 menit	1		1.626		1.765
			1.63522	1.642	1.77326	1.782
				1.638		1.773
		2		1.627		1.708
			1.63778	1.639	1.71447	1.722
				1.647		1.713
		3		1.602		1.662
			1.61733	1.62	1.67101	1.673
				1.63		1.678

## Sheet: Fig 4A
	Data Figure 4 A. Percentage of HMG CoA reductase inhibition from germinated and ungerminated P. lunatus versus pravastatin as drug reference during digestion gastrointestinal simulation via the in vitro method.
	Sample	Batch	% HMG CoA reductase inhibition
			Average	Analysis Repetition
	Pravastatin	1		0.5935
			0.58954	0.5824
				0.5927
		2		0.5946
			0.588139	0.5832
				0.5866
		3		0.5822
			0.585337	0.5912
				0.5826
	Sample	Batch	% HMG CoA reductase inhibition
			Ungerminated		Germinated (72-h)
			Average	Analysis Repetition	Average	Analysis Repetition
	0 menit	1		0.4746		0.844
			0.469764	0.4622	0.837497	0.8346
				0.4725		0.8339
		2		0.4732		0.8428
			0.468363	0.4668	0.839598	0.8346
				0.4651		0.8414
		3		0.4598		0.8388
			0.465562	0.466	0.836096	0.8326
				0.4709		0.8369
	30 menit	1		0.4838		0.8484
			0.487275	0.4896	0.845902	0.8368
				0.4884		0.8525
		2		0.4768		0.8524
			0.480271	0.4824	0.850105	0.8468
				0.4826		0.8511
		3		0.4904		0.8512
			0.481672	0.478	0.848704	0.8452
				0.4766		0.8497
	60 menit	1		0.4978		0.8604
			0.490077	0.487	0.851506	0.8534
				0.4854		0.8407
		2		0.5012		0.8514
			0.496381	0.4924	0.855709	0.8604
				0.4955		0.8553
		3		0.4986		0.8612
			0.484473	0.4734	0.854308	0.849
				0.4814		0.8527
	90 menit	1		0.5134		0.861
			0.508989	0.5024	0.859211	0.854
				0.5112		0.8626
		2		0.5264		0.8566
			0.514593	0.5134	0.852907	0.8424
				0.504		0.8597
		3		0.5108		0.8532
			0.513192	0.5214	0.854308	0.8508
				0.5074		0.8589
	120 menit	1		0.5264		0.8668
			0.532804	0.5445	0.860612	0.8582
				0.5275		0.8568
		2		0.5434		0.8595
			0.532804	0.5318	0.85851	0.8517
				0.5232		0.8643
		3		0.5345		0.8624
			0.532104	0.5296	0.859911	0.8582
				0.5322		0.8591
	150 menit	1		0.5665		0.8714
			0.565025	0.5586	0.866916	0.8687
				0.57		0.8606
		2		0.5802		0.8654
			0.57413	0.5748	0.863413	0.8598
				0.5674		0.86504
		3		0.5726		0.8714
			0.569928	0.5635	0.868317	0.8691
				0.5737		0.86445
	180 menit	1		0.6218		0.8756
			0.625263	0.6306	0.871819	0.8712
				0.6234		0.86866
		2		0.6334		0.8801
			0.630166	0.6279	0.87392	0.8748
				0.6292		0.86686
		3		0.6368		0.8756
			0.632968	0.6287	0.87392	0.869
				0.6334		0.87716
	210 menit	1		0.6542		0.8754
			0.651179	0.648	0.876021	0.8698
				0.6513		0.88286
		2		0.6524		0.8742
			0.65188	0.6476	0.872519	0.8712
				0.6556		0.8722
		3		0.6548		0.8802
			0.651179	0.6464	0.876722	0.8726
				0.6523		0.8774
	240 menit	1		0.6468		0.796
			0.643474	0.6406	0.791968	0.7884
				0.643		0.7915
		2		0.6524		0.8013
			0.644175	0.6485	0.79547	0.7978
				0.6316		0.7873
		3		0.6368		0.8014
			0.644175	0.64828	0.799673	0.7946
				0.6474		0.803

## Sheet: Fig 4.B
Data Figure 4 B. Percentage of HMG CoA reductase inhibition from germinated and ungerminated P. lunatus in perfusate that contain unabsorbed peptide (n=3, P<0.05 for significant difference).
Samples	Batch	% HMG CoA reductase inhibition
		Absorption Time (minutes)
		0		30		60		90		120
		Average	Analysis Repetition	Average	Analysis Repetition	Average	Analysis Repetition	Average	Analysis Repetition	Average	Analysis Repetition
Ungerminated kara kratok	1		0.6508		0.6456		0.5812		0.5302		0.4646
		0.651179	0.661	0.639865	0.6364	0.577449	0.5762	0.528092	0.5276	0.462777	0.4598
			0.6417		0.6376		0.5749		0.5265		0.4639
	2		0.6566		0.6342		0.5714		0.5454		0.4744
		0.65188	0.6487	0.627194	0.6178	0.572016	0.5682	0.545214	0.5362	0.467936	0.4678
			0.6503		0.6296		0.5764		0.554		0.4616
	3		0.6498		0.6314		0.5606		0.547		0.4874
		0.651179	0.6606	0.628815	0.6246	0.557085	0.5524	0.546332	0.5398	0.484008	0.4792
			0.6431		0.6304		0.5583		0.5522		0.4854
Germinated kara kratok - 72 hours	1		0.8811		0.8364		0.7694		0.7012		0.4246
		0.876021	0.8722	0.830217	0.8284	0.771933	0.7714	0.69477	0.6904	0.426249	0.4318
			0.87485		0.8259		0.775		0.6927		0.4223
	2		0.869		0.8549		0.7686		0.672		0.4306
		0.872519	0.8738	0.853366	0.8434	0.764012	0.7586	0.673972	0.6684	0.428236	0.4268
			0.8748		0.8618		0.7648		0.6815		0.4273
	3		0.8808		0.9194		0.7462		0.6382		0.4246
		0.876722	0.8698	0.920964	0.9249	0.744766	0.7396	0.64039	0.6468	0.42609	0.4214
			0.8796		0.9186		0.7485		0.6362		0.4323

## Sheet: Fig 5
		Fig. 5. Percentage absorption of germinated and ungerminated P. lunatus based on the calculation of peptide concentration before and after the in situ absorption method (n=3, P<0.05 for significant difference).
		Unabsorbed peptide
		Sample	Batch	% unabsorption of peptide
				Absorption Time (minutes)
				0	30		60		90		120
					Average	Analysis Repetition	Average	Analysis Repetition	Average	Analysis Repetition	Average	Analysis Repetition
		Ungerminated kara kratok	1	1		0.9458		0.8413		0.8024		0.7316
					0.944582	0.9379	0.856351	0.8592	0.795849	0.7962	0.74291	0.7524
						0.95		0.8686		0.7889		0.7447
			2			0.9388		0.8768		0.8012		0.7334
					0.93954	0.9345	0.861392	0.8554	0.795849	0.7874	0.745431	0.7579
						0.9453		0.852		0.7989		0.745
			3			0.9536		0.8644		0.8035		0.7501
					0.942061	0.9324	0.858871	0.8546	0.79837	0.7928	0.737868	0.7213
						0.9402		0.8576		0.7988		0.7422
		Germinated kara kratok - 72 hours	1	1		0.9421		0.8328		0.7452		0.6614
					0.93261	0.9352	0.836288	0.8318	0.733545	0.7218	0.675752	0.6766
						0.9205		0.8443		0.7336		0.6893
			2			0.928		0.8316		0.7287		0.6624
					0.919767	0.916	0.840569	0.8468	0.718562	0.7046	0.66933	0.6745
						0.9153		0.8433		0.7224		0.6711
			3			0.9188		0.8444		0.7216		0.6826
					0.926189	0.924	0.840569	0.8365	0.731405	0.7308	0.682173	0.6805
						0.9358		0.8408		0.7418		0.6834
		Absorbed peptide
		Calculated by 100% minus unabsorbed peptide
		Sample	Batch	% unabsorption of peptide
				Absorption Time (minutes)
				0	30		60		90		120
					Average	Analysis Repetition	Average	Analysis Repetition	Average	Analysis Repetition	Average	Analysis Repetition
		Ungerminated kara kratok	1	0		0.0542		0.1587		0.1976		0.2684
					0.0554178	0.0621	0.143649	0.1408	0.204151	0.2038	0.25709	0.2476
						0.05		0.1314		0.2111		0.2553
			2			0.0612		0.1232		0.1988		0.2666
					0.0604596	0.0655	0.138608	0.1446	0.204151	0.2126	0.254569	0.2421
						0.0547		0.148		0.2011		0.255
			3			0.0464		0.1356		0.1965		0.2499
					0.0579387	0.0676	0.141129	0.1454	0.20163	0.2072	0.262132	0.2787
						0.0598		0.1424		0.2012		0.2578
		Germinated kara kratok - 72 hours	1	0		0.0579		0.1672		0.2548		0.3386
					0.0673897	0.0648	0.163712	0.1682	0.266455	0.2782	0.324248	0.3234
						0.0795		0.1557		0.2664		0.3107
			2			0.072		0.1684		0.2713		0.3376
					0.0802326	0.084	0.159431	0.1532	0.281438	0.2954	0.33067	0.3255
						0.0847		0.1567		0.2776		0.3289
			3			0.0812		0.1556		0.2784		0.3174
					0.0738111	0.076	0.159431	0.1635	0.268595	0.2692	0.317827	0.3195
						0.0642		0.1592		0.2582		0.3166
